# Supplementary material for: Patient and general population values for luminal and perianal fistulising Crohn’s disease health states
Source: Springer Nature journal article supplement (doi:10.1007/s10198-019-01065-y), 2019-05-17
Supplement: MOESM3 [file 16731592]

## **Supplementary material S3 Predictors of TTO utilities**

**Journal: European Journal of Health Economics (2019)**

**Title: Patient and general population values for luminal and perianal fistulising Crohn's disease health states**

Authors: Fanni Rencz<sup>1,2</sup>, Peep F.M. Stalmeier<sup>3</sup>, Márta Péntek<sup>1</sup>, Valentin Brodszky<sup>1</sup>, Gábor Ruzsa<sup>4,5</sup>, Lóránt Gönczi<sup>6</sup>, Károly Palatka<sup>7</sup>, László Herszényi<sup>8</sup>, Eszter Schäfer<sup>8</sup>, János Banai<sup>8</sup>, Mariann Rutka<sup>9</sup>, László Gulácsi<sup>1\*</sup> and Peter L. Lakatos<sup>6,10\*</sup>

1 – Department of Health Economics, Corvinus University of Budapest, Fővám tér 8, H-1093, Budapest, Hungary

2 – Hungarian Academy of Sciences, Premium Postdoctoral Research Program, Nádor u. 7, H-1051 Budapest, Hungary

3 – Radboud University Medical Centre, PO Box 9101, 6500 HB, Nijmegen, The Netherlands

4 – Eötvös Loránd University of Sciences, Institute of Psychology, Doctoral School of Psychology, Izabella u. 46, H-1064, Budapest, Hungary

5 – Department of Statistics, Corvinus University of Budapest, Fővám tér 8, H-1093, Budapest, Hungary

6 – 1st Department of Medicine, Semmelweis University, Korányi Sándor u. 2/a, H-1083 Budapest, Hungary

7 – Division of Gastroenterology, Department of Internal Medicine, University of Debrecen, Nagyerdei krt. 98, H-4032 Debrecen, Hungary

8 – Medical Centre, Hungarian Defence Forces, Podmaniczky u. 109-111, H-1062 Budapest, Hungary

9 – 1st Department of Internal Medicine, University of Szeged, Korányi fasor 8-10, H-6720 Szeged, Hungary

10 – Division of Gastroenterology, McGill University, MUHC, Montreal General Hospital, 1650 Ave. Cedar, D16.173.1, Montreal, QC, H3G 1A4, Canada

Corresponding author: Fanni Rencz, [fanni.rencz@uni-corvinus.hu](mailto:fanni.rencz@uni-corvinus.hu)

### Supplementary material S3 Predictors of TTO utilities

| Variables                                                    | Patient's current health TTO<br>n=201, R <sup>2</sup> =0.14 |            |         | Patients' TTO for hypothetical health states <sup>a</sup><br>n=102, R <sup>2</sup> =0.47 |            |         | General population TTO for hypothetical health states <sup>b</sup><br>n=155, R <sup>2</sup> =0.55 |            |         |
|--------------------------------------------------------------|-------------------------------------------------------------|------------|---------|------------------------------------------------------------------------------------------|------------|---------|---------------------------------------------------------------------------------------------------|------------|---------|
|                                                              | Coefficient<br>t                                            | Std. Error | p-value | Coefficient<br>t                                                                         | Std. Error | p-value | Coefficient<br>t                                                                                  | Std. Error | p-value |
| Intercept                                                    | 0.933                                                       | 0.032      | <0.001  | 0.749                                                                                    | 0.103      | <0.001  | 0.599                                                                                             | 0.116      | <0.001  |
| <b><i>Hypothetical health states</i></b>                     |                                                             |            |         |                                                                                          |            |         | -                                                                                                 | -          | -       |
| Severe luminal disease (sCD)                                 | -                                                           | -          | -       | -0.215                                                                                   | 0.017      | <0.001  | -0.299                                                                                            | 0.016      | <0.001  |
| Mild luminal disease with active perianal fistulas (mPFCD)   | -                                                           | -          | -       | -0.118                                                                                   | 0.015      | <0.001  | -0.121                                                                                            | 0.013      | <0.001  |
| Severe luminal disease with active perianal fistulas (sPFCD) | -                                                           | -          | -       | -0.312                                                                                   | 0.019      | <0.001  | -0.393                                                                                            | 0.016      | <0.001  |
| <b><i>Demographics</i></b>                                   |                                                             |            |         |                                                                                          |            |         |                                                                                                   |            |         |
| Age (years)                                                  | -                                                           | -          | -       | -                                                                                        | -          | -       | 0.002                                                                                             | 0.001      | 0.045   |
| Employment                                                   |                                                             |            |         |                                                                                          |            |         |                                                                                                   |            |         |
| Full-time                                                    | -                                                           | -          | -       | -0.071                                                                                   | 0.031      | 0.020   | -                                                                                                 | -          | -       |
| Retired                                                      | -0.176                                                      | 0.082      | 0.033   | -                                                                                        | -          | -       | -                                                                                                 | -          | -       |
| Student                                                      | 0.106                                                       | 0.053      | 0.047   | -                                                                                        | -          | -       | -                                                                                                 | -          | -       |
| Disability pensioner                                         | -                                                           | -          | -       | -                                                                                        | -          | -       | -0.174                                                                                            | 0.075      | 0.021   |
| <b><i>Clinical characteristics</i></b>                       |                                                             |            |         |                                                                                          |            |         |                                                                                                   |            |         |
| BMI                                                          | -                                                           | -          | -       | 0.012                                                                                    | 0.004      | 0.005   | -                                                                                                 | -          | -       |
| CDAI (0-600)                                                 | -                                                           | -          | -       | -0.001                                                                                   | 0.0003     | 0.036   | -                                                                                                 | -          | -       |
| Pain VAS (0-10)                                              | -0.032                                                      | 0.008      | <0.001  | -                                                                                        | -          | -       | -                                                                                                 | -          | -       |
| Previous non-resection surgery                               | -0.095                                                      | 0.039      | 0.015   | -                                                                                        | -          | -       | -                                                                                                 | -          | -       |
| <b><i>Other characteristics</i></b>                          |                                                             |            |         |                                                                                          |            |         |                                                                                                   |            |         |
| Family member or acquaintance diagnosed with CD              | -                                                           | -          | -       | -                                                                                        | -          | -       | 0.111                                                                                             | 0.055      | 0.043   |
| Subjective life expectancy (years)                           | -                                                           | -          | -       | -                                                                                        | -          | -       | 0.003                                                                                             | 0.001      | 0.018   |

a: Responses of 104 patients were excluded (n=50 non-traders, n=20 valued all health states for the same value, n=6 had more than two missing TTO responses and n=28 had illogical preferences). Thus, 102 patients were included in the regression analysis for hypothetical health states.

b: Responses of 66 people from the general public were excluded before regression analysis (n=26 non-traders and n=40 had illogical preferences). Thus, a total of 155 responses were analysed.

Independent variables: *Age* = respondent's age (years); *BMI* = body mass index (kg/m<sup>2</sup>); *CDAI*: score on Crohn's Disease Activity Index (0-600); *Disability pensioner*: no=0, yes=1; *Family member or friend diagnosed with CD*: no=0, yes=1; *Full-time employed*: no=0, yes=1; *Pain VAS*: pain currently experienced on a 0-100 visual analogue scale; *Previous non-resection surgery*: no=0, yes=1; *Retired*: no=0, yes=1; *Student*: no=0, yes=1; *Subjective life expectancy* = the respondent's subjective life expectancy (years)  
 BMI = body mass index; CD = Crohn's disease; CDAI = Crohn's Disease Activity Index; TTO = time trade-off; VAS = visual analogue scale
